# Supplementary material for: Construction of an AI-2 quorum sensing induced heterologous protein expression system in Escherichia coli
Source: PeerJ. 2021 Nov 16;9:e12497. doi: 10.7717/peerj.12497 (PMC8603832; doi:10.7717/peerj.12497)
Supplement: Supplemental Information 2 [file peerj-09-12497-s002.xlsx]

## Sheet: Sheet1
Time (hour)	LB				pET28a-GFPuv				pET28a-GFPuv+0.5mM IPTG				pXWZ1-GFPuv
2	1319.34	1349.35	1356.65	1290.52	1199.55	1222.45	1335.52	1307.11	2910.89	2880.59	2876.58	2718.6	2587.27	2613.86	2578.2	2444.63
4	1077.16	1160.32	1180.92	1059.04	1974.45	1994.86	1950.37	1958.51	4555.63	4609.3	4650.57	4632.18	4350.21	4458.21	4604.65	4473.44
6	1221.72	1239.75	1262.4	1260.07	3217.7	3176.47	3234.61	3292.47	6769.56	6610.12	6860.16	6685.75	8304.13	8385.06	8540.08	8270.45
8	1276.47	1353.85	1332.05	1296.17	3244.62	3310.43	3258.67	3301.56	9193.28	9273.56	9426.74	9110.53	12558.1	12996.6	13228.1	12903.8
10	1361.92	1385.37	1392.42	1373.08	3427.01	3468.81	3456.28	3493.24	11442.2	11599.4	12036.8	11907.4	16237.1	15657.6	16890.2	15985.1
12	1307.4	1366.62	1357.96	1334.47	3591.34	3500.06	3598.18	3643.03	13747	13885.2	13972.8	13975.5	19451.7	19659.5	19068.9	19504.8
14	1369.58	1405.45	1417.59	1346.15	3453.04	3402.96	3447.98	3461.08	15619.5	15966.7	15779.2	15918.4	22933.8	22126.7	22452.5	22550.5
16	1360.25	1399.9	1438.57	1320.39	3573.23	3455.6	3249.35	3455.08	19443.5	19866.8	19927	19690.2	24501.9	24946.2	24320.7	24325.1
18	1292.27	1337.38	1359.04	1320.6	3478.09	3494.89	3543.01	3413.93	22972.2	22045.4	22972.3	22312.6	28046.7	27039	27306	27401.1
24	1226.45	1272.21	1273.17	1256.12	3569.46	3640.36	3542.14	3633.37	28065.5	27869.9	28153.1	27196.4	32270.7	32871.5	33266.5	32870.4
