# Supplementary material for: Construction of an AI-2 quorum sensing induced heterologous protein expression system in Escherichia coli
Source: PeerJ. 2021 Nov 16;9:e12497. doi: 10.7717/peerj.12497 (PMC8603832; doi:10.7717/peerj.12497)
Supplement: Supplemental Information 3 [file peerj-09-12497-s003.xlsx]

## Sheet: Sheet1
Time (hour)	pET28-LacZ			pET28-LacZ+0.5mM IPTG			pXWZ1-LacZ
2	726	715	724	40617	43067	42619	40701	42587	42467
4	1594	1584	1602	42705	42166	43771	58354	55905	56902
6	1529	1512	1531	56745	55737	55284	60287	59171	58937
8	1699	1737	1713	70946	72087	70712	90133	87117	87711
10	1828	1777	1830	59149	57999	57718	68996	70489	71569
12	1916	1897	1905	42547	38014	39710	60485	56060	57745
14	1697	1681	1734	34876	32464	33391	47882	46575	47358
24	1820	1819	1838	33661	33333	26470	44988	43547	40178
